# Supplementary material for: The Minhang Pediatric Biobank cohort study: protocol overview and baseline characteristics
Source: Springer Nature journal article supplement (doi:10.1186/s12887-024-04763-6), 2024-04-27
Supplement: MOESM1 [file 27027402]

**Table S1. Baseline characteristics of the participants divide by the seven diseases with the highest prevalence <sup>†,‡</sup>.**

| Characteristics                 | Disease       |               |               |              |                      |               |               | Total         |
|---------------------------------|---------------|---------------|---------------|--------------|----------------------|---------------|---------------|---------------|
|                                 | Dental caries | Bronchitis    | Pneumonia     | Asthma       | Obese/<br>Overweight | Myopia        | Amblyopia     |               |
| <b>Age, years</b>               | 6.65 (0.26)   | 6.64 (0.26)   | 6.63 (0.26)   | 6.65 (0.28)  | 6.68 (0.26)          | 6.61 (0.43)   | 6.63 (0.26)   | 6.64 (0.29)   |
| <b>Number of siblings</b>       | 1.31 (0.67)   | 1.30 (0.57)   | 1.29 (0.93)   | 1.30 (0.56)  | 1.28 (0.56)          | 1.30 (0.59)   | 1.36 (0.70)   | 1.39 (1.07)   |
| <b>Height</b>                   | 123.81 (5.39) | 123.89 (5.67) | 123.93 (5.53) | 124.9 (5.15) | 127.35 (5.55)        | 123.73 (5.59) | 123.43 (5.42) | 123.89 (5.39) |
| <b>Weight</b>                   | 24.85 (5.14)  | 25.15 (5.15)  | 25.10 (5.13)  | 26.20 (5.39) | 32.72 (6.06)         | 24.85 (5.08)  | 25.04 (5.12)  | 25.15 (5.17)  |
| <b>BMI</b>                      | 16.11 (2.48)  | 16.27 (2.45)  | 16.25 (2.46)  | 16.66 (2.57) | 20.07 (2.81)         | 16.10 (2.50)  | 16.30 (2.51)  | 16.27 (2.54)  |
| <b>Waist circumference</b>      | 54.46 (6.49)  | 55.01 (6.87)  | 54.97 (6.78)  | 56.48 (6.96) | 63.98 (7.90)         | 54.54 (6.71)  | 54.66 (6.89)  | 55.07 (6.68)  |
| <b>Hip circumference</b>        | 65.06 (5.90)  | 65.25 (6.27)  | 65.31 (5.81)  | 66.69 (5.93) | 73.00 (7.72)         | 64.59 (7.00)  | 65.41 (6.05)  | 65.39 (6.07)  |
| <b>Sex</b>                      |               |               |               |              |                      |               |               |               |
| Male                            | 862 (50.68)   | 520 (56.58)   | 422 (50.66)   | 270 (68.88)  | 198 (57.89)          | 137 (47.40)   | 118 (46.09)   | 4339 (51.58)  |
| Female                          | 839 (49.32)   | 399 (43.42)   | 411 (49.34)   | 122 (31.12)  | 144 (42.11)          | 152 (52.60)   | 138 (53.91)   | 4073 (48.42)  |
| <b>Passive smoking exposure</b> |               |               |               |              |                      |               |               |               |
| Yes                             | 777 (45.68)   | 461 (50.16)   | 399 (47.90)   | 193 (49.23)  | 192 (56.14)          | 141 (48.79)   | 130 (50.78)   | 4011 (47.68)  |
| No                              | 921 (54.14)   | 456 (49.62)   | 427 (51.26)   | 198 (50.51)  | 150 (43.86)          | 148 (51.21)   | 126 (49.22)   | 4343 (51.63)  |
| <b>Exercise</b>                 |               |               |               |              |                      |               |               |               |
| Low                             | 151 (8.88)    | 109 (11.86)   | 106 (12.73)   | 49 (12.5)    | 37 (10.82)           | 28 (9.69)     | 38 (14.84)    | 758 (9.01)    |
| Moderate                        | 1497 (88.01)  | 774 (84.22)   | 692 (83.07)   | 327 (83.42)  | 287 (83.92)          | 247 (85.47)   | 211 (82.42)   | 7308 (86.88)  |
| High                            | 49 (2.88)     | 33 (3.59)     | 34 (4.08)     | 15 (3.83)    | 17 (4.97)            | 9 (3.11)      | 7 (2.73)      | 291 (3.46)    |

**Screen use**

|        |              |             |             |             |             |             |             |              |
|--------|--------------|-------------|-------------|-------------|-------------|-------------|-------------|--------------|
| ≤2h    | 1614 (94.89) | 863 (93.91) | 787 (94.48) | 362 (92.35) | 324 (94.74) | 271 (93.77) | 242 (94.53) | 7778 (92.46) |
| >2&≤4h | 75 (4.41)    | 41 (4.46)   | 37 (4.44)   | 22 (5.61)   | 15 (4.39)   | 15 (5.19)   | 11 (4.30)   | 467 (5.55)   |
| >4&≤6h | 3 (0.18)     | 4 (0.44)    | 4 (0.48)    | 3 (0.77)    | 2 (0.58)    | 1 (0.35)    | 0 (0.00)    | 25 (0.30)    |
| >6h    | 0 (0.00)     | 2 (0.22)    | 0 (0.00)    | 2 (0.51)    | 1 (0.29)    | 0 (0.00)    | 0 (0.00)    | 11 (0.13)    |

**Sleep quality**

|           |             |             |             |             |             |             |             |              |
|-----------|-------------|-------------|-------------|-------------|-------------|-------------|-------------|--------------|
| Very good | 670 (39.39) | 297 (32.32) | 296 (35.53) | 144 (36.73) | 151 (44.15) | 108 (37.37) | 99 (38.67)  | 3378 (40.16) |
| Good      | 783 (46.03) | 455 (49.51) | 401 (48.14) | 177 (45.15) | 144 (42.11) | 129 (44.64) | 119 (46.48) | 3754 (44.63) |
| Average   | 242 (14.23) | 163 (17.74) | 130 (15.61) | 68 (17.35)  | 46 (13.45)  | 50 (17.3)   | 38 (14.84)  | 1212 (14.41) |
| Bad       | 5 (0.29)    | 3 (0.33)    | 5 (0.60)    | 3 (0.77)    | 1 (0.29)    | 2 (0.69)    | 0 (0.00)    | 35 (0.42)    |

**Sleep time**

|          |              |             |             |             |             |             |             |              |
|----------|--------------|-------------|-------------|-------------|-------------|-------------|-------------|--------------|
| ≤9h      | 443 (26.04)  | 233 (25.35) | 210 (25.21) | 80 (20.41)  | 99 (28.95)  | 77 (26.64)  | 60 (23.44)  | 2122 (25.23) |
| >9&≤10h  | 1158 (68.08) | 643 (69.97) | 578 (69.39) | 285 (72.70) | 222 (64.91) | 191 (66.09) | 174 (67.97) | 5695 (67.70) |
| >10&≤11h | 94 (5.53)    | 41 (4.46)   | 43 (5.16)   | 25 (6.38)   | 19 (5.56)   | 19 (6.57)   | 20 (7.81)   | 526 (6.25)   |
| >11h     | 1 (0.06)     | 1 (0.11)    | 1 (0.12)    | 1 (0.26)    | 0 (0.00)    | 0 (0.00)    | 0 (0.00)    | 17 (0.20)    |

**House renovation****during the past year**

|     |              |             |             |             |             |             |             |              |
|-----|--------------|-------------|-------------|-------------|-------------|-------------|-------------|--------------|
| Yes | 369 (21.69)  | 207 (22.52) | 207 (24.85) | 91 (23.21)  | 79 (23.10)  | 59 (20.42)  | 45 (17.58)  | 1755 (20.86) |
| No  | 1326 (77.95) | 709 (77.15) | 624 (74.91) | 299 (76.28) | 262 (76.61) | 230 (79.58) | 210 (82.03) | 6601 (78.47) |

**Pet ownership**

|     |              |             |             |             |             |             |             |              |
|-----|--------------|-------------|-------------|-------------|-------------|-------------|-------------|--------------|
| Yes | 338 (19.87)  | 196 (21.33) | 167 (20.05) | 69 (17.60)  | 79 (23.10)  | 59 (20.42)  | 58 (22.66)  | 1502 (17.86) |
| No  | 1358 (79.84) | 718 (78.13) | 660 (79.23) | 320 (81.63) | 262 (76.61) | 229 (79.24) | 197 (76.95) | 6851 (81.44) |

**Ventilation**

|                    |              |             |             |             |             |             |             |              |
|--------------------|--------------|-------------|-------------|-------------|-------------|-------------|-------------|--------------|
| Everyday           | 1539 (90.48) | 838 (91.19) | 756 (90.76) | 357 (91.07) | 311 (90.94) | 256 (88.58) | 233 (91.02) | 7556 (89.82) |
| 1 to 3 times/week  | 137 (8.05)   | 72 (7.83)   | 70 (8.40)   | 29 (7.40)   | 26 (7.60)   | 29 (10.03)  | 19 (7.42)   | 691 (8.21)   |
| 1 to 5 times/month | 14 (0.82)    | 4 (0.44)    | 4 (0.48)    | 3 (0.77)    | 3 (0.88)    | 4 (1.38)    | 3 (1.17)    | 87 (1.03)    |
| Seldom             | 7 (0.41)     | 4 (0.44)    | 1 (0.12)    | 1 (0.26)    | 1 (0.29)    | 0 (0.00)    | 0 (0.00)    | 34 (0.40)    |
| Never              | 0 (0.00)     | 0 (0.00)    | 0 (0.00)    | 0 (0.00)    | 0 (0.00)    | 0 (0.00)    | 0 (0.00)    | 3 (0.04)     |

**Cooking and heating****fuel**

|                            |              |             |             |             |             |             |             |              |
|----------------------------|--------------|-------------|-------------|-------------|-------------|-------------|-------------|--------------|
| Coal gas                   | 147 (8.64)   | 79 (8.60)   | 66 (7.92)   | 34 (8.67)   | 23 (6.73)   | 21 (7.27)   | 19 (7.42)   | 692 (8.23)   |
| Natural gas                | 1378 (81.01) | 752 (81.83) | 689 (82.71) | 316 (80.61) | 281 (82.16) | 237 (82.01) | 212 (82.81) | 6738 (80.10) |
| Liquefied<br>petroleum gas | 78 (4.59)    | 42 (4.57)   | 38 (4.56)   | 21 (5.36)   | 19 (5.56)   | 14 (4.84)   | 15 (5.86)   | 458 (5.44)   |
| Electricity                | 42 (2.47)    | 24 (2.61)   | 23 (2.76)   | 14 (3.57)   | 11 (3.22)   | 9 (3.11)    | 4 (1.56)    | 275 (3.27)   |
| Coal                       | 0 (0.00)     | 0 (0.00)    | 0 (0.00)    | 1 (0.26)    | 0 (0.00)    | 1 (0.35)    | 0 (0.00)    | 12 (0.14)    |
| Others                     | 4 (0.24)     | 1 (0.11)    | 0 (0.00)    | 0 (0.00)    | 0 (0.00)    | 0 (0.00)    | 0 (0.00)    | 8 (0.10)     |

---

†: Data are presented as mean (SD) or number (%).

‡: Missing (n): Passive smoking exposure (58); Exercise (55); Screen use (131); Sleep quality (33); Sleep time (52); House renovation during the past year (56); Pet ownership (59); Ventilation (41); Cooking and heating fuel (229).
